# Supplementary material for: Elucidation of acid strength effect on ibuprofen adsorption and release by aluminated mesoporous silica nanoparticles
Source: Royal Society of Chemistry journal article supplement (doi:10.1039/c4ra16761a), 2015-01-01
Supplement: c4ra16761a1.pdf [file c4ra16761a1.pdf]

**Elucidation of acid strength effect on ibuprofen adsorption and release by  
aluminated mesoporous silica nanoparticles†**

N.H.N. Kamarudin,<sup>a</sup> A. A. Jalil,<sup>\*a,b</sup> S. Triwahyono,<sup>c,d</sup> M. R. Sazegar,<sup>c,d</sup> S. Hamdan,<sup>e</sup> S.  
Baba,<sup>e</sup> A. Ahmad<sup>a,b</sup>

<sup>a</sup>*Department of Chemical Engineering, Faculty of Chemical Engineering, Universiti  
Teknologi Malaysia, 81310 UTM Johor Bahru, Johor, Malaysia*

<sup>b</sup>*Institute of Hydrogen Economy, Universiti Teknologi Malaysia, 81310 UTM Johor Bahru,  
Johor, Malaysia*

<sup>c</sup>*Department of Chemistry, Faculty of Science, Universiti Teknologi Malaysia, 81310 UTM  
Johor Bahru, Johor, Malaysia*

<sup>d</sup>*Ibnu Sina Institute for Fundamental Science Studies, Universiti Teknologi Malaysia, 81310  
UTM Johor Bahru, Johor, Malaysia.*

<sup>e</sup>*Department of Biological Science, Faculty of Bioscience and Bioengineering, Universiti  
Teknologi Malaysia, 81310 UTM Skudai, Johor, Malaysia.*

Corresponding author:

Assoc. Prof. Dr. Aishah A. Jalil,  
Institute of Hydrogen Economy,  
Faculty of Chemical Engineering,  
Universiti Teknologi Malaysia  
81310 UTM Johor Bahru, Johor, Malaysia  
Tel : +60-7-5535581 Fax : +60-7-5588166  
Email : [aishah@cheme.utm.my](mailto:aishah@cheme.utm.my)

## ELECTRONIC SUPPLEMENTARY INFORMATION

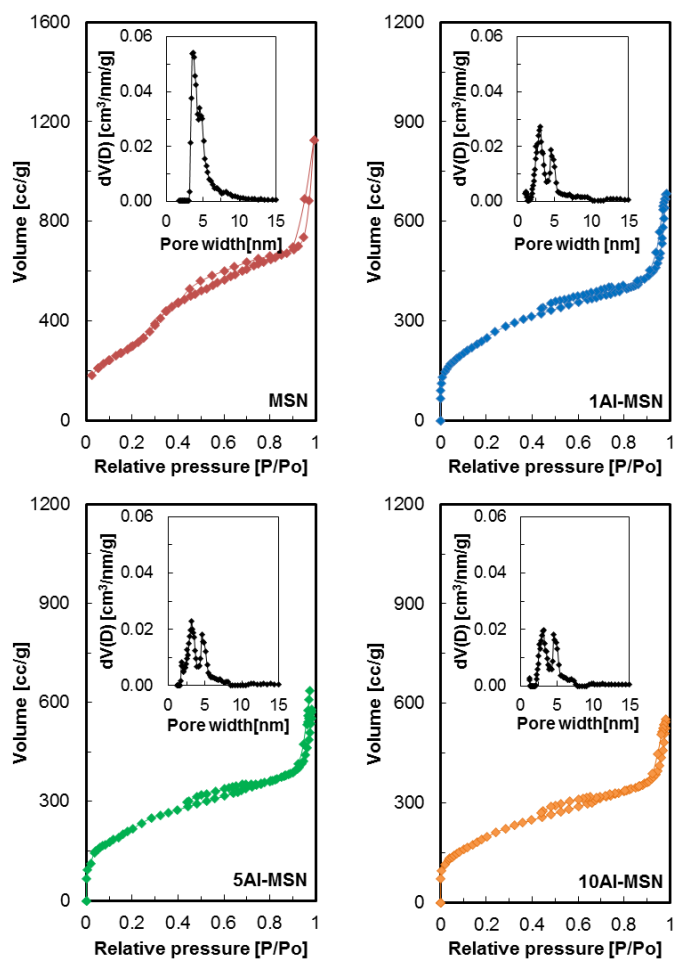

**Fig. S1.** Nitrogen adsorption–desorption isotherms and pore distribution (inset figures) of bare MSN and Al-MSNs

---

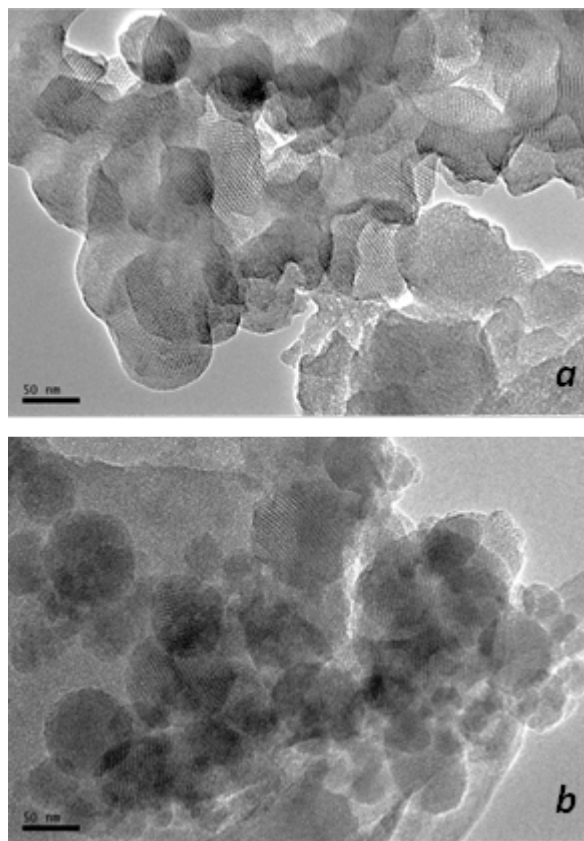

**Fig. S2.** TEM images of (a) MSN and (b) 10Al-MSN

---

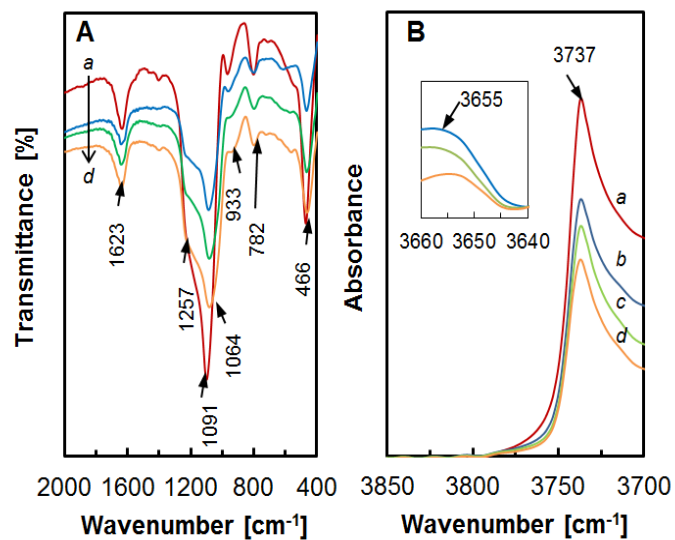

**Fig. S3.** FTIR spectra of (a) MSN; (b) 1Al-MSN; (c) 5-Al-MSN; (d) 10-Al-MSN in the range of (A) 2000-400  $\text{cm}^{-1}$  (B) 3850-3700  $\text{cm}^{-1}$

---
